# Supplementary material
Source: publisher figshare collection journal article supplement (https://acs.figshare.com/ndownloader/files/8455409)
Supplement: Supplementary file 1 [file 8455409]

## Supplementary file: Glossary

| Acronym or abbreviation | Meaning                                                                                 |
|-------------------------|-----------------------------------------------------------------------------------------|
| <i>Absorbents</i>       |                                                                                         |
| AA                      | Amino acid                                                                              |
| AEEA                    | N-(2-aminoethyl) ethanolamine, 2-[(2-Aminoethyl)amino]ethanol                           |
| AMP                     | 2-Amino-2-methyl-1-propanol                                                             |
| EDA                     | ethylenediamine 1,2-Ethanediamine                                                       |
| EG                      | Ethylene glycol                                                                         |
| DEA                     | Diethanolamine, 2,2'-Iminodiethanol                                                     |
| DEEA                    | <i>N,N</i> -Diethylethanolamine                                                         |
| MEA                     | 2-Aminoethanol, ethanolamine, monoethanolamine                                          |
| MDEA                    | methyldiethanolamine, 2,2'-(Methylimino)diethanol                                       |
| MMEA                    | N-methylethanolamine                                                                    |
| PE                      | 2-piperidineethanol                                                                     |
| PM                      | 1-Piperidinylmethanol                                                                   |
| PZ                      | Piperazine                                                                              |
| TBAE                    | 2-(tert-butylamino)ethanol, 2-[(2-Methyl-2-propanyl)amino]ethanol                       |
| TEA                     | <i>N,N</i> -Diethylethanamine                                                           |
| TMG                     | tetramethylguanidine 1,1,3,3-Tetramethylguanidine                                       |
| TRIS                    | 2-Amino-2-hydroxymethyl-1,3-propanediol                                                 |
|                         |                                                                                         |
| <i>Acronyms</i>         |                                                                                         |
| AIMD                    | <i>ab initio</i> molecular dynamics (non-empirical, first principles quantum mechanics) |
| ATR                     | attenuated total reflectance                                                            |
| AUA                     | anisotropic united-atom force field                                                     |
| BO                      | Born–Oppenheimer approximation                                                          |
| BSSE                    | basis set superposition error                                                           |

|           |                                                                                                                                                                                                      |
|-----------|------------------------------------------------------------------------------------------------------------------------------------------------------------------------------------------------------|
| CASSCF    | complete active space self-consistent field                                                                                                                                                          |
| CBMC      | configurational-bias Monte Carlo                                                                                                                                                                     |
| CBS       | complete basis set extrapolation                                                                                                                                                                     |
| CC        | coupled clusters theory                                                                                                                                                                              |
| GCMC      | canonical Monte Carlo                                                                                                                                                                                |
| CASSCF    | complete active space self-consistent field                                                                                                                                                          |
| CCS       | CO <sub>2</sub> capture and storage/sequestration                                                                                                                                                    |
| CCSD      | coupled cluster wave functions characterized by iterative inclusion of single and double excitations                                                                                                 |
| CCSD(T)   | coupled cluster wave functions characterized by iterative inclusion of single and double excitations with perturbative (4th-order and one term from the fifth order) inclusion of triple excitations |
| CCSDT     | coupled cluster wave functions characterized by iterative inclusion of single, double and triple excitations                                                                                         |
| CFCMC     | continuous fractional component Monte Carlo                                                                                                                                                          |
| CI        | configuration interaction                                                                                                                                                                            |
| CISDTQ    | configuration interaction wave functions incorporated all single and double substitutions as well as triple and quadruple substitutions                                                              |
| CISD[TQ]  | configuration interaction wave functions incorporated all single and double substitutions as well as limited triple and quadruple substitutions                                                      |
| CPCM      | conductor-like polarizable continuum model                                                                                                                                                           |
| COSMO     | conductor-like solvent model                                                                                                                                                                         |
| COSMO-RS  | conductor-like solvent model for real solvents                                                                                                                                                       |
| COSY      | correlation spectroscopy                                                                                                                                                                             |
| CSF       | configuration state function                                                                                                                                                                         |
| CSM       | continuum solvation model                                                                                                                                                                            |
| DFT       | density functional theory                                                                                                                                                                            |
| DMC       | Diffusion quantum Monte Carlo                                                                                                                                                                        |
| EPR       | electron paramagnetic resonance                                                                                                                                                                      |
| FCI       | full configuration interaction                                                                                                                                                                       |
| FN-DMC    | Fixed-node Diffusion quantum Monte Carlo                                                                                                                                                             |
| FTIR      | Fourier transform infrared spectroscopy                                                                                                                                                              |
| GB Method | generalized Born method                                                                                                                                                                              |

|                     |                                                                                                   |
|---------------------|---------------------------------------------------------------------------------------------------|
| GEMC                | Gibbs ensemble Monte Carlo                                                                        |
| HF                  | Hartree-Fock                                                                                      |
| HMBC                | heteronuclear multiple-bond correlation spectroscopy                                              |
| HSQC                | heteronuclear single-quantum correlation spectroscopy                                             |
| IEF-PCM             | integral equation formalism-polarizable continuum model                                           |
| IR                  | infrared spectroscopy                                                                             |
| MC                  | Monte Carlo                                                                                       |
| MCSCF               | multi-configuration self-consistent field                                                         |
| MD                  | molecular dynamics                                                                                |
| MM                  | molecular mechanism                                                                               |
| MPx                 | Møller-Plesset perturbation theory (where x is the order of perturbation expansion)               |
| MTC                 | mass transfer coefficient                                                                         |
| NEMD                | non-equilibrium Molecular Dynamics simulations                                                    |
| NMR                 | nuclear magnetic resonance spectroscopy                                                           |
| NPT                 | isothermal-isobaric ensemble                                                                      |
| NVT                 | canonical ensemble                                                                                |
| ONIOM               | our own <i>N</i> -layered integrated molecular orbital and molecular mechanics                    |
| OPLS-AA Force Field | optimized potentials for liquid simulations-all atom force field                                  |
| OPLS-UA Force Field | optimized potentials for liquid simulations-united atom force field                               |
| PBC                 | periodic boundary condition                                                                       |
| PB Equation         | Poisson–Boltzmann equation                                                                        |
| PCC                 | post-combustion CO <sub>2</sub> capture                                                           |
| PCM                 | polarizable continuum model                                                                       |
| PES                 | potential energy surface                                                                          |
| QC                  | Quantum Chemistry                                                                                 |
| QM                  | Quantum Mechanics                                                                                 |
| QMC                 | quantum Monte Carlo                                                                               |
| QM/MM               | Quantum mechanics/molecular mechanics (hybrid simulations methods)                                |
| QSAR                | quantitative structure–activity relationship                                                      |
| ReaxFF              | reactive force field                                                                              |
| RISM-SCF-SEDD       | reference interaction site model–self-consistent field with spatial electron density distribution |

|                        |                                                                                                                      |
|------------------------|----------------------------------------------------------------------------------------------------------------------|
| RMS                    | root mean square                                                                                                     |
| RxMC                   | reaction-ensemble Monte Carlo                                                                                        |
| SASA                   | solvent-accessible surface area                                                                                      |
| SCF                    | self-consistent field                                                                                                |
| SCRf                   | self-consistent reaction-field                                                                                       |
| SMD                    | solvent model based on electron density                                                                              |
| SMx                    | solvent model (where x is an alphanumeric label to show the version) which is based on the generalized Born equation |
| SPC Model              | simple point charge model                                                                                            |
| TraPPE-EH Force Field  | transferable potentials for phase equilibria-explicit hydrogen force fields                                          |
| TraPPE-Pol Force Field | transferable potentials for phase equilibria-polarizable force fields                                                |
| TraPPE-UA Force Field  | transferable potentials for phase equilibria-united atom force fields                                                |
| TS                     | transition state                                                                                                     |
| UAHF radii             | united atom Hartree–Fock radii                                                                                       |
| UAKS radii             | united-atom Kohn-Sham radii                                                                                          |
| UFF radii              | universal force field radii                                                                                          |
| UV-vis                 | Ultraviolet-visible spectrophotometry                                                                                |
| VLE                    | Vapour–liquid equilibrium                                                                                            |
| VMC                    | Variational quantum Monte Carlo                                                                                      |
| μVT                    | grand canonical ensemble                                                                                             |
